# Supplementary material for: Vitamin D receptor expression controls proliferation of naïve CD8+ T cells and development of CD8 mediated gastrointestinal inflammation
Source: PubMed Central journal article supplement (PMC3923390; doi:10.1186/1471-2172-15-6), 2014-02-07
Supplement: 1471-2172-15-6-S3.pdf [file 1471-2172-15-6-S3.pdf]

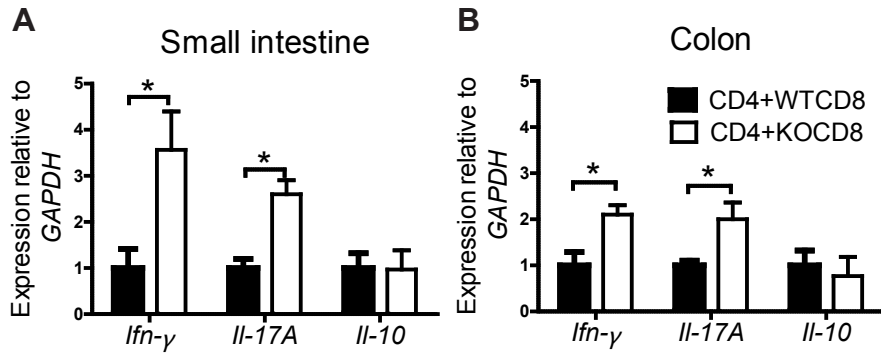

Supplemental Figure 3. mRNA expression for *Ifn-γ*, *Il-17A*, and *Il-10* in the (A) small intestine and (B) colon of Rag KO recipients of CD4+WTCD8 or CD4+KOCD8 (same mice as Fig. 2). Data is from n=6-8 mice per group. ANOVA, \*P < 0.05.
