# Supplementary material for: Vitamin D receptor expression controls proliferation of naïve CD8+ T cells and development of CD8 mediated gastrointestinal inflammation
Source: BMC Immunol. 2014 Feb 7;15:6. doi: 10.1186/1471-2172-15-6 (PMC3923390; doi:10.1186/1471-2172-15-6)
Supplement: Additional file 1: Figure S1 — (A) CD8+ and CD4+column purification was followed by cell sorting. Histograms show the frequencies of CD8+ T cell subsets before (pre-sort) and after (post-sort) sorting of splenocytes from WT and VDR KO mice. (B) CD4+CD45RBhigh pre-sort and post-sort populations. The purity of the CD8+ and the CD4+CD45RBhigh T cells was >99%. (C) Dot plots show the single staining for PE-conjugated CD45.1, FITC-conjugated CD8β, and isotype controls for both PE and FITC staining in the IEL for Figure 3A. (D) Lymphocytes were first gated on TCRβ+ cells. Bar graphs shows the frequency of CD25+ T cells within the CD8+ population. Values are the mean ± SEM of 8-10 mice per group. Student’s t-tests, n.s., not significant. [file 1471-2172-15-6-S1.pdf]

### A CD8 sorting

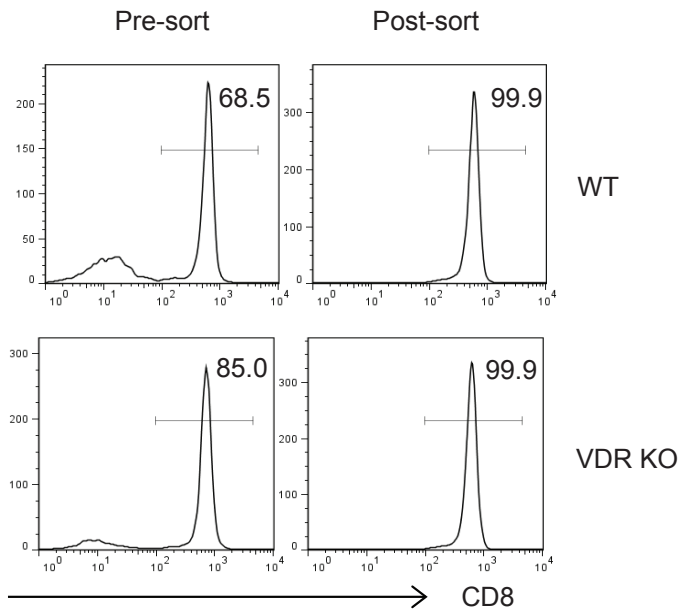

### B CD4<sup>+</sup>CD45RB<sup>high</sup> sorting

Pre-sort Post-sort

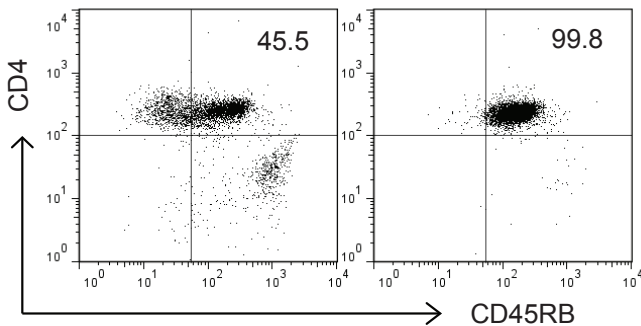

### C

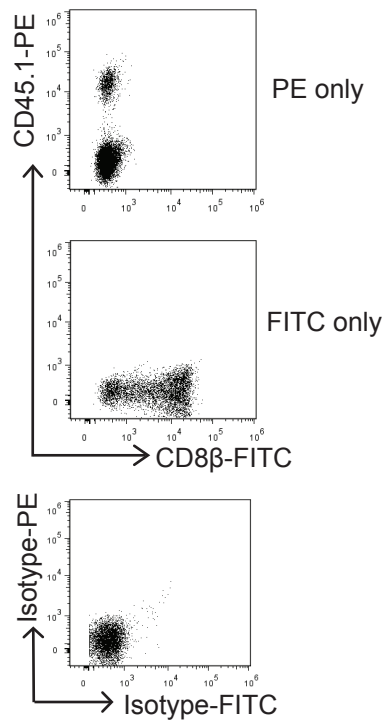

### D

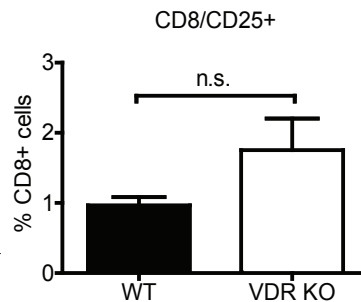

Supplementary Figure 1. (A) CD8<sup>+</sup> and CD4<sup>+</sup> column purification was followed by cell sorting. Histograms show the frequencies of CD8<sup>+</sup> T cell subsets before (pre-sort) and after (post-sort) sorting of splenocytes from WT and VDR KO mice. (B) CD4<sup>+</sup>CD45RB<sup>high</sup> pre-sort and post-sort populations. The purity of the CD8<sup>+</sup> and the CD4<sup>+</sup>CD45RB<sup>high</sup> T cells was >99%. (C) Dot plots show the single staining for PE-conjugated CD45.1, FITC-conjugated CD8 $\beta$ , and isotype controls for both PE and FITC staining in the IEL for Fig. 3A. (D) Lymphocytes were first gated on TCR $\beta$ <sup>+</sup> cells. Bar graphs shows the frequency of CD25<sup>+</sup> T cells within the CD8<sup>+</sup> population. Values are the mean  $\pm$  SEM of 8-10 mice per group. Student's t-tests, n.s., not significant.
